# Supplementary material for: QTL analyses for tolerance to abiotic stresses in a common bean (Phaseolus vulgaris L.) population
Source: PLoS One. 2018 Aug 29;13(8):e0202342. doi: 10.1371/journal.pone.0202342 (PMC6114847; doi:10.1371/journal.pone.0202342)
Supplement: S4 Table — Pos. cM: Genetic position in centimorgan; Physical pos: physical position in Mbp, according to reference genome version 2.1; PVE (%): Phenotypic variation explained by the QTL; Add: Estimated additive effect of the marker; Sources: parent BAT 881 B or G21212 G that contributes the positive allele. For full trait names, see Table 1. (XLSX) [file pone.0202342.s006.xlsx]

## Sheet: caption
S4 Table. All QTLs identified in the BAT 881 x G21212 population evaluating traits at four locations in Colombia.
Pos. cM: Genetic position in centimorgan; Physical pos: physical position in Mbp, according to reference genome version 2.1; PVE (%): Phenotypic variation explained by the QTL; Add: Estimated additive effect of the marker; Sources: parent BAT 881 B or G21212 G that contributes the positive allele. For full trait names see Table 1.

## Sheet: QTLs
QTL name	QTL name_trials	Chr.	Pos. (cM)	Physical pos. left marker (Mb)*	Physical pos. right marker (Mb)*	Left marker name	Right marker name	LOD	PVE (%)	Add	Source	prev reported QTL	Reference	Interval position Mb
Yield components
Yd1.1	Yd1.1_Pop99_HP	Pv01	22		4.73281	Y503	1529725_567896	3.2005	12.3702	44.3178	B
Yd1.2	Yd1.2_Dar97_HP	Pv01	46	31.8331		95706_19407	AGTA09	3.5844	14.8693	133.126	B
Yd1.3	Yd1.3_all	Pv01	53			R1401	BMa6a	3.1974	7.5855	33.4591	B
Yd3.1	Yd3.1_all	Pv03	8			W1601	W1602	2.9626	6.7127	-31.5906	G
Yd3.2	Yd3.2_Pal02_I	Pv03	82	39.3869		239064_52485	AL401	4.5966	15.5497	-103.21	G	Yld3.2CG, SY3.3SC , SY3.3, Seed yield	Blair Iriarte Beebe 2006, Mukeshimana et al 2014, Hoyos-Villegas et al. 2016, Kamfwa et al. 2015a	37-45.6
Yd4.1	Yd4.1_Dar98_HP	Pv04	0		0.458859	V401	PV-CTT001	3.8022	15.6589	-268.856	G
Yd4.1	Yd4.1_Dar	Pv04	0		0.458859	V401	PV-CTT001	4.783	19.1613	-159.221	G
Yd4.1	Yd4.1_Pal02_I	Pv04	4		0.458859	V401	PV-CTT001	3.4199	12.3954	-92.7568	G
Yd4.1	Yd4.1_Qui03b_HAl_HP	Pv04	5		0.458859	V401	PV-CTT001	2.9149	14.3393	-51.161	G
Yd4.1	Yd4.1_Dar97_HP	Pv04	6	0.458859	1.53797	PV-CTT001	BMc08	4.293	19.1351	-151.607	G
Yd4.1	Yd4.1_Pop99_LP	Pv04	6	0.458859	1.53797	PV-CTT001	BMc08	5.0911	20.4662	-62.2007	G
Yd4.1	Yd4.1_all	Pv04	6	0.458859	1.53797	PV-CTT001	BMc08	9.8708	29.2861	-66.8074	G
Yd4.1	Yd4.1_Pop99_HP	Pv04	7	1.53797	1.53798	BMc08	BMc255	7.0752	29.5318	-69.0843	G
Yd4.1	Yd4.1_Pop	Pv04	7	1.53797	1.53798	BMc08	BMc255	3.6949	18.2471	-89.0896	G
Yd4.2	Yd4.2_Pal	Pv04	66		44.6389	CGAA03	871953_853527	2.9856	14.7586	-54.0196	G
Yd6.1	Yd6.1_all	Pv06	113	29.7868		BMc128	BMc283	3.6478	8.8944	36.5028	B
Yd7.1	Yd7.1_Pop99_LP	Pv07	26	3.36502	4.20936	745181_210054	701495_548353	5.6408	23.0444	-65.8862	G	SY7.3	Hoyos-Villegas et al. 2016	4.59-5.03
Yd7.1	Yd7.1_Dar98_HP	Pv07	28	3.36502	4.20936	745181_210054	701495_548353	3.5988	15.3862	-247.883	G	SY7.3	Hoyos-Villegas et al. 2016	4.59-5.03
Yd7.1	Yd7.1_Dar	Pv07	28	3.36502	4.20936	745181_210054	701495_548353	3.8394	15.4531	-132.982	G	SY7.3	Hoyos-Villegas et al. 2016	4.59-5.03
Yd7.1	Yd7.1_all	Pv07	28	3.36502	4.20936	745181_210054	701495_548353	5.9382	15.0861	-47.507	G	SY7.3	Hoyos-Villegas et al. 2016	4.59-5.03
Yd8.1	Yd8.1_Dar98_LP	Pv08	0	7.12189		BMc121	Q1702	5.4865	24.9577	-138.7	G
Yd8.1	Yd8.2_Qui03b_HAl_MP	Pv08	1	7.12189		BMc121	Q1702	3.1397	16.1333	114.623	B
Yd8.2	Yd8.3_Pal02_I	Pv08	37			L201	S1001	4.6313	16.5488	104.841	B
100SdW1.1	100SdW1.1_Qui03b_HAl_HP	Pv01	75		41.8059	BM201	480857_341609	2.942	14.3348	-0.5912	G
100SdW3.1	100SdW3.1_Pal02_D	Pv03	0			AGTA06	Z601	2.9851	14.4629	0.5682	B
100SdW4.1	100SdW4.1_Pop99_LP	Pv04	9		0.090544	T1202	115966_84234	3.2697	11.3008	-0.4462	G
100SdW7.1	100SdW7.1_Pop99_LP	Pv07	23	0.97997	3.36502	1397360_737325	745181_210054	5.7756	21.9049	-0.6318	G
100SdW7.2	100SdW7.2_Pop	Pv07	64			O1501	W1604	5.8866	23.176	-0.6163	G
100SdW7.3	100SdW7.3_Pop99_HP	Pv07	80	32.3323	32.7362	351368_192819	266395_55354	3.3046	14.5883	-0.535	G
100SdW7.4	100SdW7.4_Pop99_LP	Pv07	95	35.0759	35.8784	235093_128558	1025434_318975	3.1983	10.6432	-0.4362	G
100SdW8.1	100SdW8.1_Pal02_I	Pv08	0	7.12189		BMc121	Q1702	5.6141	22.0361	0.7931	B	SW8.3, sw8.1	Hoyos-Villegas et al. 2016, Blair et al 2006	3.14-7.5
100SdW9.1	100SdW9.1_Pop	Pv09	17	9.49191	13.9321	BMa9	658250_27617	5.9024	23.1684	0.6171	B	Sw9.2	Blair and Izquierdo 2012	9.4
100SdW9.2	100SdW9.2_Pop	Pv09	42	29.109	32.4834	165815_50667	161010_9238	3.2161	12.5625	-0.4535	G
100SdW11.1	100SdW11.1_Pal00_D	Pv10	0	1.07379	1.56715	1829281_984363	1829281_1482380	2.9291	14.2112	-0.6177	G
PNA4.1	PNA4.1_Qui03b_HAl_HP	Pv11	5		0.458859	V401	PV-CTT001	3.2539	16.0282	-8.212	G
Differential stress responses
%YdL_D4.1	%YdL_D4.1	Pv04	15			806145_731182	CAAA01	3.7179	15.9952	-3.6395	G
%YdL_LP7.1	%YdL_LP7.1	Pv07	43			AG1003	E101	2.5037	12.5278	6.2363	B
%SdWL_LP6.1	%SdWL_LP6.1	Pv06	5			L203	W602	4.733	18.1563	1.8989	B
%SdWL_LP7.1	%SdWL_LP7.1	Pv07	93			H1803	235093_128558	2.5437	10.0806	1.4187	B
%SdWL_LP8.1	%SdWL_LP78.1	Pv08	90			O1502	BM229	3.8447	14.6107	-1.68	G
Trait for vigor plant
CB1.1	CB1.1_Pal00_I	Pv01	83		45.4043	AGTA03	444734_158966	4.2904	18.4693	216	B	Shoot Biomass	Kamfwa et al 2015b	48.1
CB2.1	CB2.1_Qui03b_HAl_MP	Pv02	64		43.5563	AGAT01	192852_174229	3.1805	17.4181	158.857	B
CB4.1	CB4.1_Qui03b_HAl_HP	Pv04	49		41.7388	HRG	BMd08	2.9479	14.78	-72.3622	G
CB8.1	CB8.1_Qui03b_HAl_MP	Pv08	41			S1001	O1603	4.365	19.6929	167.273	B
CB9.1	CB9.1_Pal00_I	Pv09	0		0.293049	AG1001	74590_37586	3.6854	15.004	-196.435	G
LAI4.1	LAI4.1_Pal02_D	Pv04	59	41.7388	44.3866	BMd08	BMc225	3.3421	18.3311	0.1484	B
LB2.1	LB2.1_Pal00_I	Pv02	12	2.07688	2.74894	488287_485560	729417_541272	3.0129	12.9174	50.6158	B
LB4.1	LB4.1_Pal02_D	Pv04	59	41.7388	44.3866	BMd08	BMc225	3.1372	17.2093	57.3098	B
LB8.1	LB8.1_Pal00_D	Pv08	56	12.6499		97394_85972	GGAA03	4.1423	19.5408	-96.8883	G
PBMP1.1	PBMP1.1_Qui02b_MAl_MP	Pv01	27	4.73281	5.43909	1529725_567896	286867_100597	2.9712	14.7769	-59.8772	G
PBMP4.1	PBMP4.1_Pal02_I	Pv04	5		0.458859	V401	PV-CTT001	4.6273	19.5223	-179.899	G
PBMP8.1	PBMP8.1_Pal02_D	Pv08	0	7.12189		BMc121	Q1702	3.7757	17.9288	83.2449	B
SBMP4.1	SBMP4.1_Pal02_D	Pv04	5		0.458859	V401	PV-CTT001	3.1139	15.2596	44.3698	B
Dry matter redistribution
HI8.1	HI8.1_Pal02_I	Pv08	95			BM229	T402	3.4562	14.0011	4.5746	B
PHI6.1	PHI6.1_Pop05_HP	Pv06	49		19.6551	CCTT07	482802_338752	3.8996	16.6696	1.0929	B
PHI7.1	PHI7.1_Qui03b_HAl_MP	Pv07	69			O1501	W1604	3.8958	23.212	0.7041	B
PHI8.1	PHI8.1_Pal02_I	Pv08	82			CTTA01	CTTA04	6.0759	27.51	1.8522	B
PHI7.2	PHI7.2_Qui03a_HAl_MP	Pv07	89		35.0759	H1803	235093_128558	3.5998	16.4396	0.913	B
PPI11.1	PPI11.1_Pal02_I	Pv11	7	1.07379	1.56715	1829281_984363	1829281_1482380	3.4572	16.7698	-5.9863	G
TNC_Sh6.1	TNC_Sh6.1_Qui03a_HAl_MP	Pv06	111		29.7868	CTTA06	BMc128	3.3914	13.3054	17.0546	B
TNC_Sh6.1	TNC_Sh6.1_Qui03b_HAl_MP	Pv06	113	29.7868		BMc128	BMc283	3.1683	12.8024	10.6738	B
TNC_Sh8.1	TNC_Sh8.1_Qui03a_HAl_MP	Pv08	1	7.12189		BMc121	Q1702	3.2238	11.8708	16.0661	B
TNC_Sh8.1	TNC_Sh8.1_Qui03b_HAl_HP	Pv08	1	7.12189		BMc121	Q1702	3.3916	13.4485	10.9747	B
TNC_Sh8.2	TNC_Sh8.2_Pal02_I	Pv08	35			L201	S1001	3.7441	17.9225	14.5709	B
TNC_Sh8.3	TNC_Sh8.3_Qui03b_HAl_MP	Pv08	77			I703	CGAA07	4.2868	17.7184	17.0553	B
Phenological trait
DF1.1	DF1.1_Qui03a_HAl_MP	Pv01	36	9.51574		156216_23400	I701	9.9439	33.4062	1.1321	B
DF1.1	DF1.1_Qui03b_HAl_MP	Pv01	36	9.51574		156216_23400	I701	8.656	32.3032	0.8913	B
DF1.1	DF1.1_Qui	Pv01	36	9.51574		156216_23400	I701	13.1586	37.0875	0.893	B
DF1.1	DF1.1_Qui03b_HAl_HP	Pv01	37			I701	BM53	6.6021	24.4929	0.7782	B
DF1.2	DF1.2_Pop05_HP	Pv01	52			AGTA09	R1401	13.7837	43.8412	2.2401	B
DF1.2	DF1.2_Dar98_HP	Pv01	53			R1401	BMa6a	11.676	42.6998	1.129	B
DF1.2	DF1.2_Dar98_LP	Pv01	53			R1401	BMa6a	6.4569	16.6007	1.1747	B
DF1.2	DF1.2_Pop99_LP	Pv01	53			R1401	BMa6a	10.6305	40.0672	1.5146	B
DF1.2	DF1.2_Pop99_HP	Pv01	53			R1401	BMa6a	11.1331	45.9256	2.6086	B
DF1.2	DF1.2_Qui02b_MAl_MP	Pv01	53			R1401	BMa6a	13.2681	47.8492	1.432	B
DF1.2	DF1.2_Dar	Pv01	53			R1401	BMa6a	6.566	16.6744	0.7291	B
DF1.2	DF1.2_Pop	Pv01	53			R1401	BMa6a	13.4308	52.5964	2.1495	B
DF1.2	DF1.2_all	Pv01	53			R1401	BMa6a	13.8704	46.8713	1.2441	B
DF1.2	DF1.2_Dar97_HP	Pv01	58			CAAA06	O1301	5.5421	23.147	0.6131	B
DF1.2	DF1.2_Dar98_LP	Pv01	59		40.1893	O1301	270999_113376	5.5635	13.355	1.0878	B
DF1.2	DF1.2_Dar	Pv01	59		40.1893	O1301	270999_113376	5.4273	12.7846	0.6591	B
DF1.3	DF1.3_Qui	Pv01	95	48.3481		BMc324	CGAA05	4.5165	10.5901	0.4762	B	DF30 and DF31PV PS, DF1XC, df1.1, D1, days to flowering, DF1.2BR	Villordo-Pineda et al 2015, Pérez-Vega et al. 2010, Blair and Chavarro 2010, Koinange et al. 1996, Kamfwa et al. 2015a, Trapp et al. 2015	47-49
DF1.3	DF1.3_Qui03a_HAl_MP	Pv01	96	48.3481		BMc324	CGAA05	3.6902	10.764	0.6406	B
DF7.1	DF7.1_Pop99_LP	Pv07	46		8.50796	E101	BARC-PV-0006056	3.0162	9.1631	0.7256	B
DF8.1	DF8.1_Dar98_HP	Pv08	0	7.12189		BMc121	Q1702	3.1202	8.1061	-0.4965	G
DF8.1	DF8.1_Qui03b_HAl_MP	Pv08	0	7.12189		BMc121	Q1702	4.8909	16.9202	-0.6515	G
DF8.1	DF8.1_all	Pv08	0	7.12189		BMc121	Q1702	3.4024	8.4459	-0.5327	G
DF8.1	DF8.1_Qui	Pv08	1	7.12189		BMc121	Q1702	5.8152	13.8251	-0.5512	G
DF8.2	DF8.2_Dar98_LP	Pv08	15			C703	CTAT06	4.1408	9.5649	-0.8948	G
DF8.2	DF8.2_Qui02b_MAl_MP	Pv08	15			C703	CTAT06	3.1202	8.7169	-0.6128	G
DF8.3	DF8.3_Dar	Pv08	35			L201	S1001	4.392	10.0644	-0.5669	G
DF8.3	DF8.3_Qui03a_HAl_MP	Pv08	40			S1001	O1603	4.6078	12.9019	-0.7045	G
DF8.4	DF8.4_Dar97_HP	Pv08	94			O1502	BM229	4.1778	16.6603	-0.5121	G
DF8.4	DF8.4_Qui03b_HAl_MP	Pv08	94			O1502	BM229	4.7987	16.4625	-0.6427	G
DF11.1	DF11.1_Qui	Pv11	0	1.07379	1.56715	1829281_984363	1829281_1482380	3.1976	6.7979	0.3818	B	DF11.2DB,Df11.1DB	Diaz et al. 2017; Blair et al. 2012	1.7
DF11.1	DF11.1_Pop05_HP	Pv11	5	1.07379	1.56715	1829281_984363	1829281_1482380	2.8922	7.3527	0.9128	B
DH1.1	DH1.1_Dar98_LP	Pv01	35	9.51574		156216_23400	I701	6.238	17.6964	1.0713	B
DH1.1	DH1.1_Pop99_HP	Pv01	35	9.51574		156216_23400	I701	4.1916	16.6006	1.2239	B
DH1.1	DH1.1_Dar98_HP	Pv01	41			I701	BM53	3.3587	9.4652	0.7307	B
DH1.2	DH1.2_Dar	Pv01	53			R1401	BMa6a	4.5764	12.8274	0.7661	B
DH5.1	DH5.1_Qui03b_HAl_MP	Pv05	38			O1504	Q501	4.2169	17.458	0.6954	B
DH6.1	DH6.1_Pal02_D	Pv06	4			W601	L203	3.0368	11.8512	0.3443	B
DH6.2	DH6.2_Qui02b_MAl_MP	Pv06	75	25.3785		BMd76	O1505	3.0742	15.9437	-1.0416	G
DH7.1	DH7.1_Dar98_LP	Pv07	87			M1503	H1803	6.9989	20.8219	1.1854	B
DH7.1	DH7.1_Dar	Pv07	87			M1503	H1803	5.7713	17.1664	0.9044	B
DH7.1	DH7.1_Dar97_HP	Pv07	89		35.0759	H1803	235093_128558	2.9241	10.611	0.6793	B
DH7.1	DH7.1_Dar98_HP	Pv07	89		35.0759	H1803	235093_128558	4.8414	14.6186	0.9285	B
DH7.2	DH7.2_Qui	Pv07	104	35.8784	38.7805	1025434_318975	BARC-PV-0001413	2.9161	12.4055	0.6572	B
DH7.2	DH7.2_all	Pv07	104	35.8784	38.7805	1025434_318975	BARC-PV-0001413	3.0779	12.6121	0.5753	B
DH8.1	DH8.1_Dar98_HP	Pv08	1	7.12189		BMc121	Q1702	8.182	26.5973	-1.2342	G
DH8.1	DH8.1_Qui03b_HAl_MP	Pv08	1	7.12189		BMc121	Q1702	5.9605	27.7217	-1.2017	G
DH8.1	DH8.1_all	Pv08	2		7.77081	Q1702	585664_91017	4.8927	19.3438	-0.7214	G
DH8.2	DH8.2_Pal00_D	Pv08	36			L201	S1001	4.2176	18.0265	-1.0598	G
DH8.2	DH8.2_Pal02_D	Pv08	36			L201	S1001	6.2457	27.489	-0.5188	G
DH8.2	DH8.2_Qui02b_MAl_MP	Pv08	36			L201	S1001	5.0439	22.4818	-1.2379	G
DH8.3	DH8.3_Pal	Pv08	56	12.6499		97394_85972	GGAA03	3.4096	16.3845	-0.5099	G
DH8.4	DH8.4_Pop05_HP	Pv08	77			I703	CGAA07	4.2751	20.1337	-0.9411	G
DH8.5	DH8.5_Pal02_I	Pv08	82			CTTA01	CTTA04	4.3597	17.8579	-0.3392	G
DH8.5	DH8.5_Pop99_HP	Pv08	82			CTTA01	CTTA04	4.9374	19.9629	-1.345	G
DH8.5	DH8.5_Qui	Pv08	82			CTTA01	CTTA04	4.534	18.6414	-0.8085	G
DH8.6	DH8.6_Dar97_HP	Pv08	94			O1502	BM229	7.3013	29.7556	-1.1199	G
DH8.6	DH8.6_Dar98_LP	Pv08	94			O1502	BM229	9.8847	32.229	-1.4636	G
DH8.6	DH8.6_Dar	Pv08	94			O1502	BM229	9.845	32.1465	-1.2282	G
Differential stress responses
%DHL_LP1.1	%DHL_LP1.1	Pv01	42			BM53	106580_59687	3.1025	12.1448	0.4161	B
%DHL_D8.1	%DHL_D8.1	Pv08	35			L201	S1001	3.6	17.24	0.54	B
Mineral nutrient I
ShN4.1	ShN4.1_Qui02b_MAl_MP	Pv04	28			BMc76	CAAA02	3.096	14.7827	-0.1341	G
ShN8.1	ShN8.1_Qui03b_HAl_MP	Pv08	0	7.12189		BMc121	Q1702	3.5934	17.1418	-0.1151	G
ShN8.1	ShN8.1_Qui03b_HAl_HP	Pv08	1	7.12189		BMc121	Q1702	5.1732	24.0707	-0.1349	G
ShN9.1	ShN9.1_Qui02b_MAl_MP	Pv09	36	27.1997	29.109	BM202	165815_50667	4.1662	18.4805	-0.1475	G	N % in Shoot Biomass	Kamfwa et al 2015b	20
SdN2.1	SdN2.1_Pal02_I	Pv02	26	2.81951		BM236	AM201	3.1718	17.6278	0.1728	B
NUE_Sh8.1	NUE_Sh8.1_Qui03a_HAl_MP	Pv08	0	7.12189		BMc121	Q1702	3.112	15.0284	1.3362	B
NUE_Sh8.1	NUE_Sh8.1_Qui03b_HAl_MP	Pv08	0	7.12189		BMc121	Q1702	3.4872	16.6803	1.0611	B
NUE_Sh8.1	NUE_Sh8.1_Qui03b_HAl_HP	Pv08	1	7.12189		BMc121	Q1702	5.1077	23.7317	1.1206	B
NUE_Sd4.1	NUE_Sd4.1_Pal02_D	Pv04	64	44.3866		BMc225	CGAA03	3.9852	19.4901	-1.4152	G
NUE_Sd8.1	NUE_Sd8.1_Pal02_I	Pv08	94			O1502	BM229	4.348	20.7813	1.6318	B
SdP2.1	SdP2.1_Pal02_I	Pv02	42			Z602	T1601	4.7553	18.1327	0.0177	B
SdP3.1	SdP3.1_Pal02_I	Pv03	82	39.3869		239064_52485	AL401	3.6132	13.3999	0.0154	B
SdP6.1	SdP6.1_Pal02_I	Pv06	49		19.6551	CCTT07	482802_338752	3.0044	10.8718	-0.0137	G
SdP7.1	SdP7.1_Qui03a_HAl_MP	Pv07	108	38.7805		BARC-PV-0001413	AGAT07	3.0256	15.4657	-0.0171	G
SdP8.1	SdP8.1_Pal02_D	Pv08	12			Z1904	C703	2.9899	14.8074	0.0216	B
SdP2.2	SdP2.2_Qui03b_HAl_MP	Pv02	51	33.6234	33.9223	BM143	BMa16	6.1145	27.08	0.0257	B
SdP8.2	SdP8.2_Qui03b_HAl_HP	Pv08	69			I703	CGAA07	3.5542	19.0526	0.0199	B
SdP2.3	SdP2.3_Qui02b_MAl_MP	Pv02	89	48.6762	48.764	946161_772366	946161_860645	3.4634	17.0586	-0.0267	G
*Physical position in Mb, according to Schmutz et al. (2014) genome version 2.1
References
Blair, M.W., C.H. Galeano, E. Tovar, M.C. Muñoz Torres, A. V Castrillón, S.E. Beebe, and I.M. Rao. 2012. Development of a Mesoamerican intra-genepool genetic map for quantitative trait loci detection in a drought tolerant × susceptible common bean (Phaseolus vulgaris L.) cross. Molecular breeding 29(1): 71–88.
Blair, M.W., G. Iriarte, and S. Beebe. 2006. QTL analysis of yield traits in an advanced backcross population derived from a cultivated Andean x wild common bean (Phaseolus vulgaris L.) cross. Theoretical and Applied Genetics 112(6): 1149–1163.
Blair, M.W., and P. Izquierdo. 2012. Use of the advanced backcross-QTL method to transfer seed mineral accumulation nutrition traits from wild to Andean cultivated common beans. Theoretical and Applied Genetics 125(5): 1015–1031.
Chavarro, M.C., and M.W. Blair. 2010. QTL analysis and effect of the fin locus on tropical adaptation in an inter-gene pool common bean population. Tropical Plant Biology 3(4): 204–218.
Diaz, L.M., J. Ricaurte, C. Cajiao, G. Galeano, I. Rao, S. Beebe, and B. Raatz. 2017. Phenotypic evaluation and QTL analysis of yield and symbiotic nitrogen fixation in a common bean population grown with two levels of phosphorus supply. Molecular Breeding in press.
Hoyos-Villegas, V., Q. Song, E.M. Wright, S.E. Beebe, and J.D. Kelly. 2016. Joint linkage QTL mapping for yield and agronomic traits in a composite map of three common bean RIL populations. Crop Science 56(5): 2546–2563.
Kamfwa, K., K.A. Cichy, and J.D. Kelly. 2015a. Genome-wide association study of agronomic traits in common bean. The Plant Genome 8(2): 1–12.
Kamfwa, K., K.A. Cichy, and J.D. Kelly. 2015b. Genome-wide association analysis of symbiotic nitrogen fixation in common bean. Theoretical and Applied Genetics.
Koinange, E., S. Singh, and P. Gepts. 1996. Genetic control of the domestication syndrome in common bean. Crop Science 1045: 1037–1045.
Mukeshimana, G., L. Butare, P.B. Cregan, M.W. Blair, and J.D. Kelly. 2014. Quantitative trait loci associated with drought tolerance in common bean. Crop Science 54: 1–16.
Pérez-Vega, E., and A. Pañeda. 2010. Mapping of QTLs for morpho-agronomic and seed quality traits in a RIL population of common bean (Phaseolus vulgaris L.). Theoretical and applied …: 1367–1380.
Schmutz J, McClean PE, Mamidi S, Wu GA, Cannon SB, Grimwood J, et al. A reference genome for common bean and genome-wide analysis of dual domestications. Nature genetics. 2014;46: 707–13. doi:10.1038/ng.3008
Trapp, J.J., C.A. Urrea, P.B. Cregan, and P.N. Miklas. 2015. Quantitative trait loci for yield under multiple stress and drought conditions in a dry bean population. Crop Science 55(4): 1596.
Villordo-Pineda, E., M.M. González-Chavira, P. Giraldo-Carbajo, J. a. Acosta-Gallegos, and J. Caballero-Pérez. 2015. Identification of novel drought-tolerant-associated SNPs in common bean (Phaseolus vulgaris). Frontiers in Plant Science 6(July): 1–9.
